# Supplementary material for: Cannabidiol inhibits Nav channels through two distinct binding sites
Source: Springer Nature journal article supplement (doi:10.1038/s41467-023-39307-6), 2023-06-17
Supplement: MOESM1 [file 41467_2023_39307_MOESM1_ESM.pdf]

Supplementary information

**Cannabidiol inhibits Na<sub>v</sub> channels through  
two distinct binding sites**

Jian Huang<sup>1,4</sup>, Xiao Fan<sup>1,4</sup>, Xueqin Jin<sup>2</sup>, Sooyeon Jo<sup>3</sup>, Hanxiong Bear Zhang<sup>3</sup>,  
Akie Fujita<sup>3</sup>, Bruce P. Bean<sup>3,5</sup> and Nieng Yan<sup>1,2,5</sup>

<sup>1</sup>Department of Molecular Biology, Princeton University, Princeton, NJ 08544, USA

<sup>2</sup>Beijing Frontier Research Center for Biological Structures, State Key Laboratory of Membrane Biology, Tsinghua-Peking Joint Center for Life Sciences, School of Life Sciences, Tsinghua University, Beijing 100084, China

<sup>3</sup>Department of Neurobiology, Harvard Medical School, 220 Longwood Avenue, Boston, MA 02115, USA

<sup>4</sup>These authors contribute equally: Jian Huang, Xiao Fan.

<sup>5</sup>To whom correspondence should be addressed: N. Yan ([nyan@princeton.edu](mailto:nyan@princeton.edu)); B.P. Bean ([bruce\\_bean@hms.harvard.edu](mailto:bruce_bean@hms.harvard.edu)).

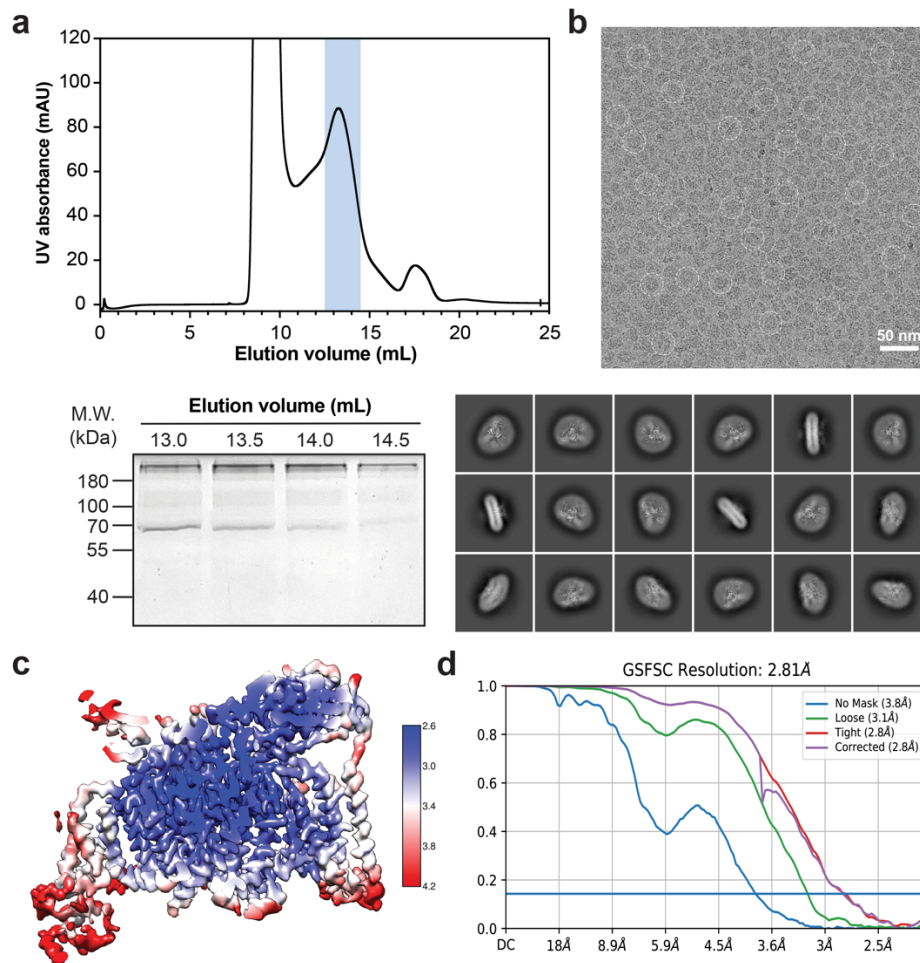

### Supplementary Fig. 1 | Structural determination of the human Na<sub>v</sub>1.7-CBD

**complex.** **a** The last step purification of the human Na<sub>v</sub>1.7-CBD complex. Shown here is a representative chromatogram of gel filtration purification. The indicated fractions were resolved on SDS-PAGE and visualized by coomassie blue staining. **b** A representative cryo-EM micrograph (*up*) and 2D classifications (*down*) of the Na<sub>v</sub>1.7-CBD complex. White circles indicate representative particles in distinct orientations. **c** Local resolution map for the 3D EM reconstitution of Na<sub>v</sub>1.7 in the presence of CBD. Local resolutions were estimated with CryoSPARC. **d** Gold-standard Fourier Shell Correlation (GSFSC) curves for the overall 3D reconstructions of Na<sub>v</sub>1.7-CBD complex.

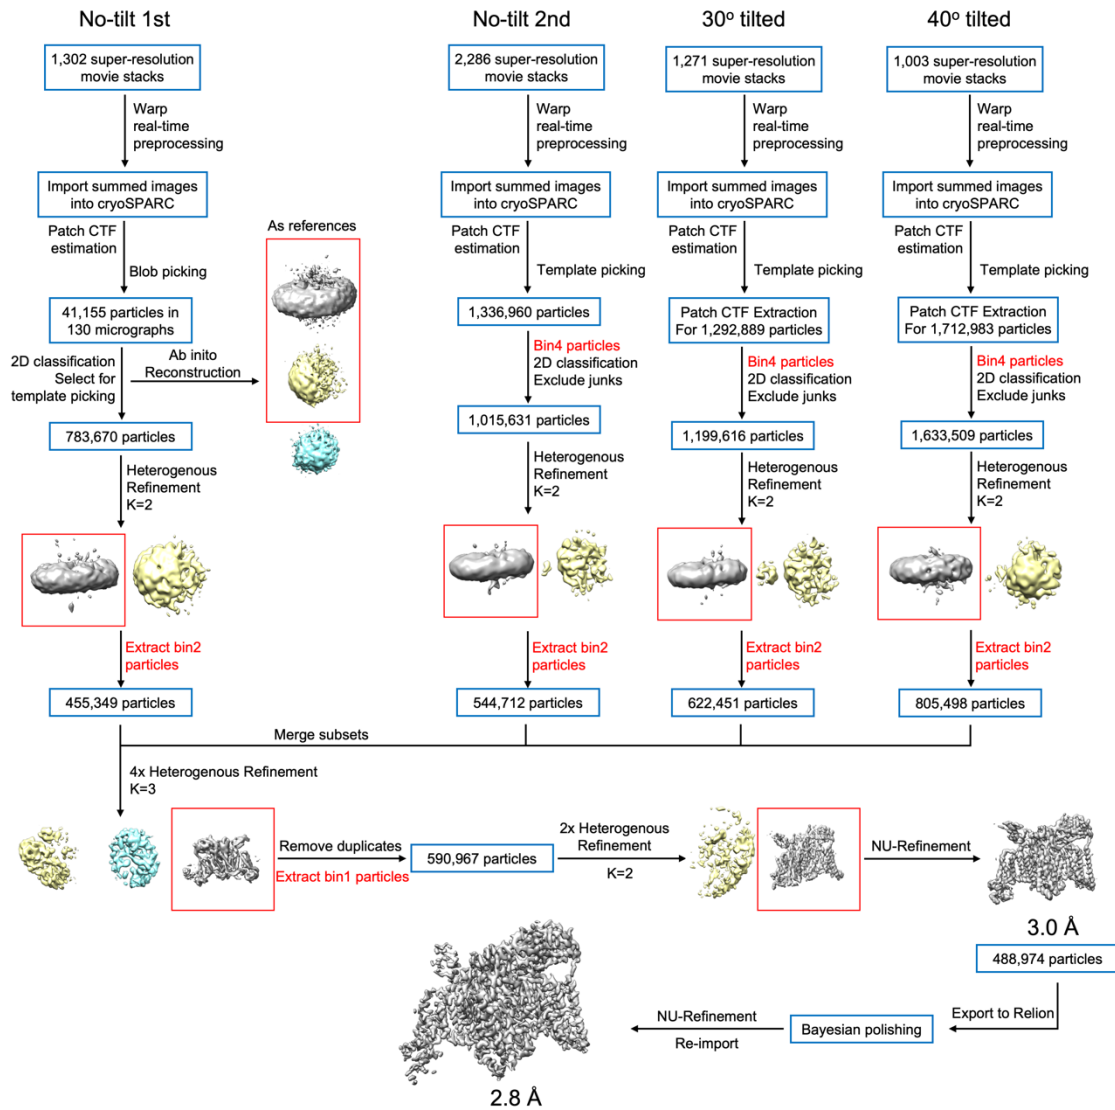

**Supplementary Fig. 2 | Flowchart for cryo-EM data processing.** Details can be found in Methods.

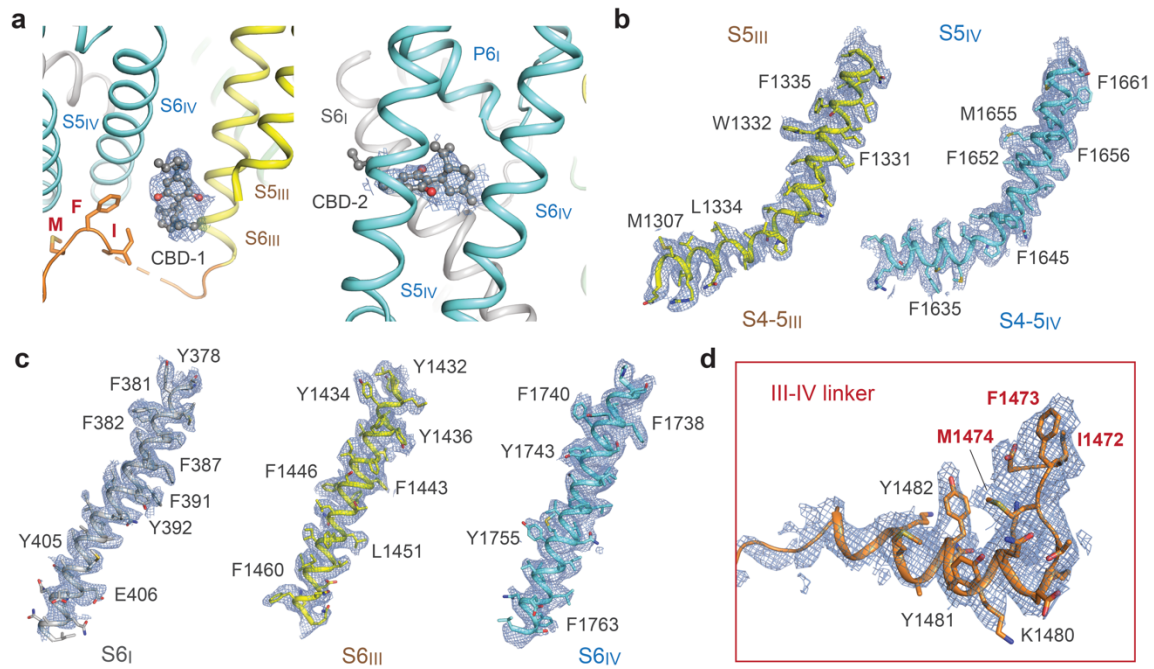

**Supplementary Fig. 3 | EM maps for representative segments involved in CBD binding.** **a** Densities for CBD-1 at the I-site (*left*) and CBD-2 at the F-site (*right*). **b,c** EM maps for the pore domain segments that contribute to CBD binding. Distinctive bulky residues are labeled. **d** Densities for the III-IV linker. All the presented local densities are shown as marine meshes contoured at 5  $\sigma$  level within PyMOL.

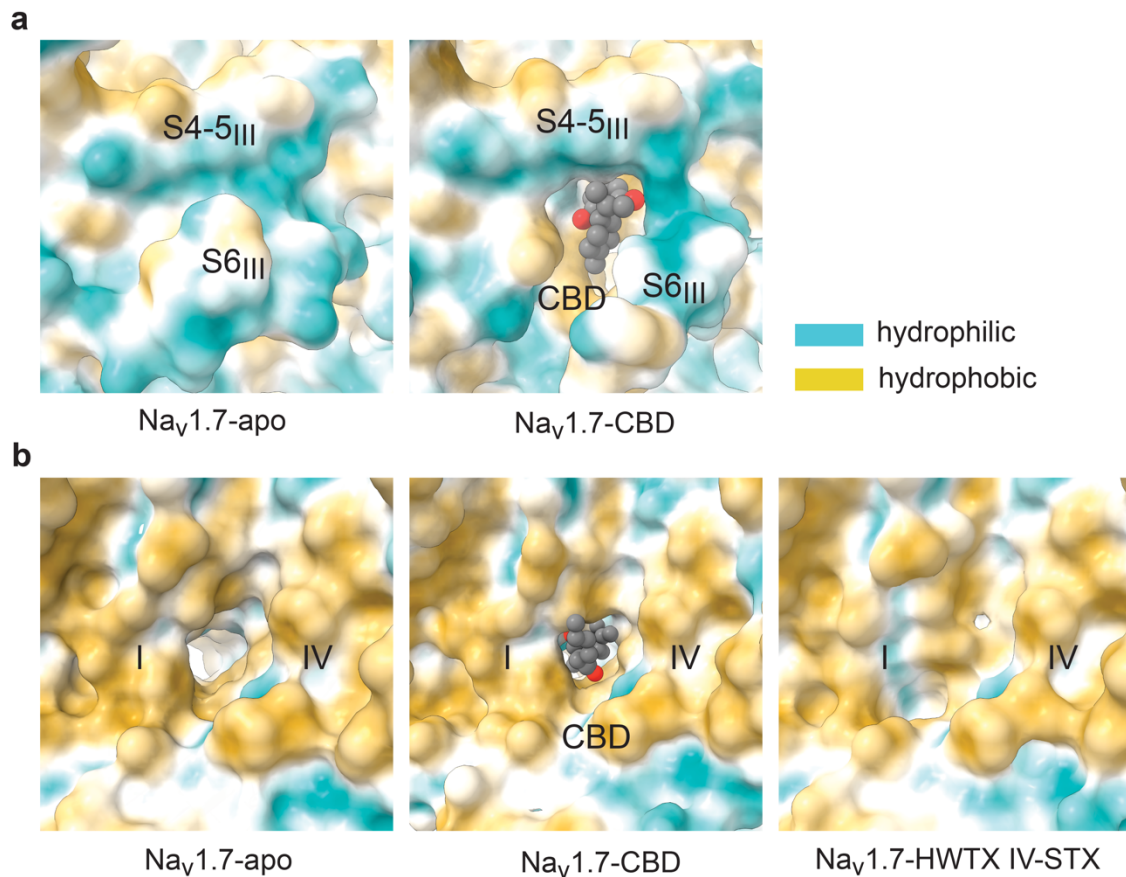

**Supplementary Fig. 4 | Hydrophobic environment of the I-site and the F-site. a**

Conformational changes upon CBD binding at the I-site. Surrounding environment is shown as the hydrophobic surface, calculated in ChimeraX. **b** Different states of the IV-I fenestration in the presence of different ligands. The IV-I fenestration, present in the apo-state (PDB: 7W9K) or CBD-bound channel, is absent in the presence of HWTX IV and STX (PDB: 6J8G).

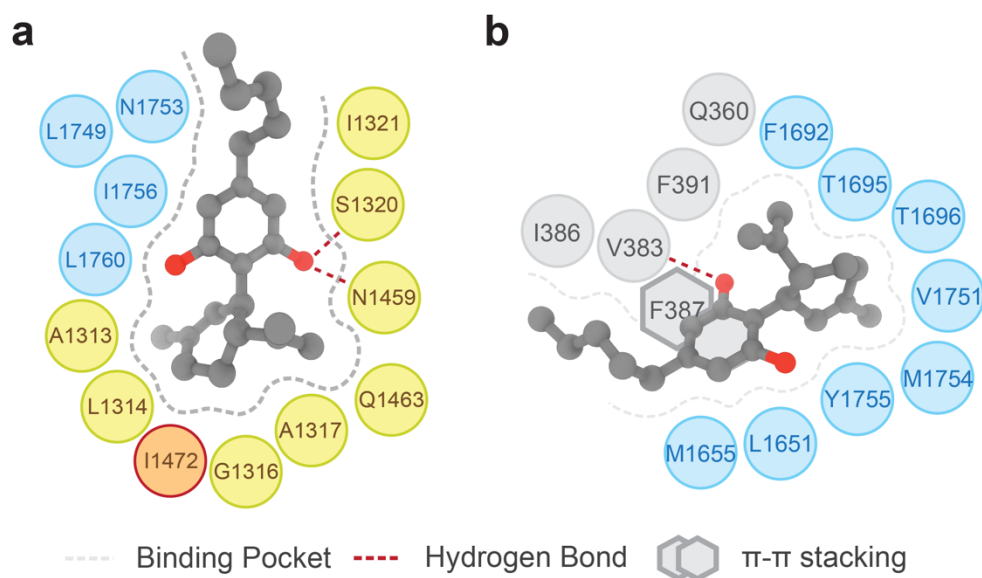

**Supplementary Fig. 5 | Plane diagram of residues constituting the I-site and the F-site.** The residues constituting the I-site are shown within a 4-Å cutoff distance from CBD (**a**) and 5 Å cutoff for the F-site (**b**). The binding pocket and potential H-bonds are indicated by gray dashed contour and red dashed lines. The residue involved in  $\pi$ - $\pi$  stacking is shown in hexagon.

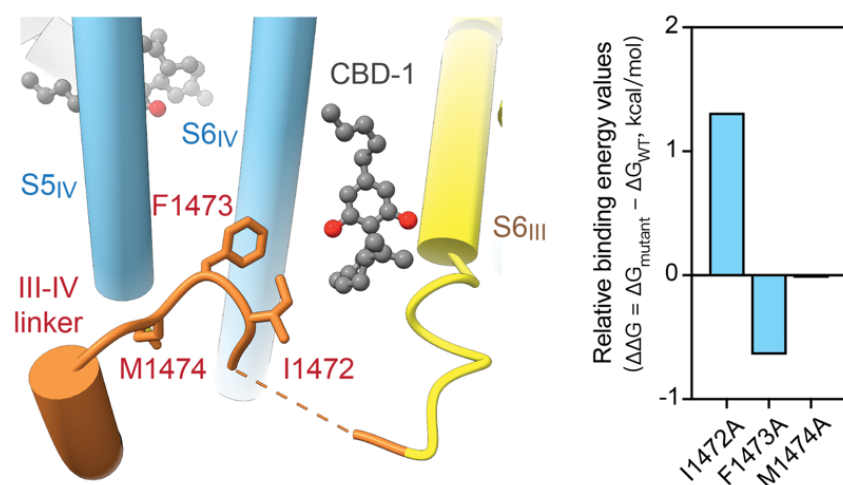

**Supplementary Fig. 6 | Position of CBD in the I-site relative to the position of the IFM wedge.** *In silico* alanine scanning indicates that Ile1472 might play a role in CBD binding at the I-site. Positive values of relative binding energies, calculated by the Prime-MM/GBSA method, indicate that substituting alanine for the native residue results in less favorable interactions with CBD.

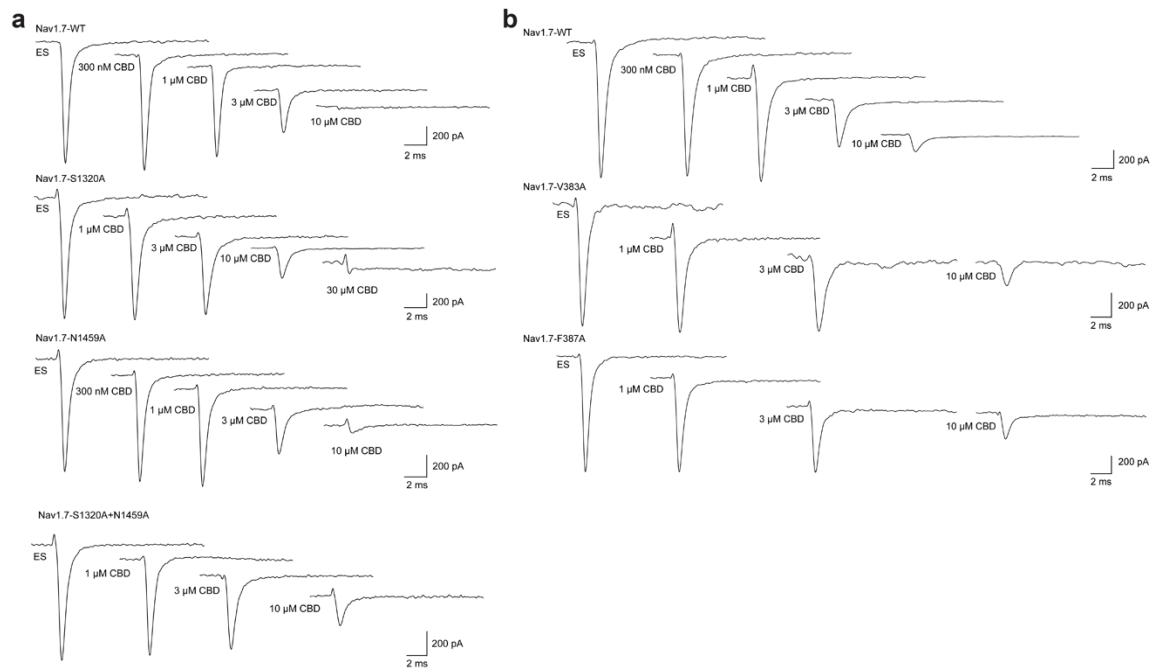

**Supplementary Fig. 7 | Blockage of Na<sub>v</sub>1.7 variants by CBD.** Representative traces for blocking the I-site (**a**) and F-site (**b**) mutants of Na<sub>v</sub>1.7 by CBD at indicated concentrations. The Na<sub>v</sub>1.7 variants in the first row contain swapped single-point mutations. Please refer to Methods for experimental details and Supplementary Table 1 for the measured parameters.



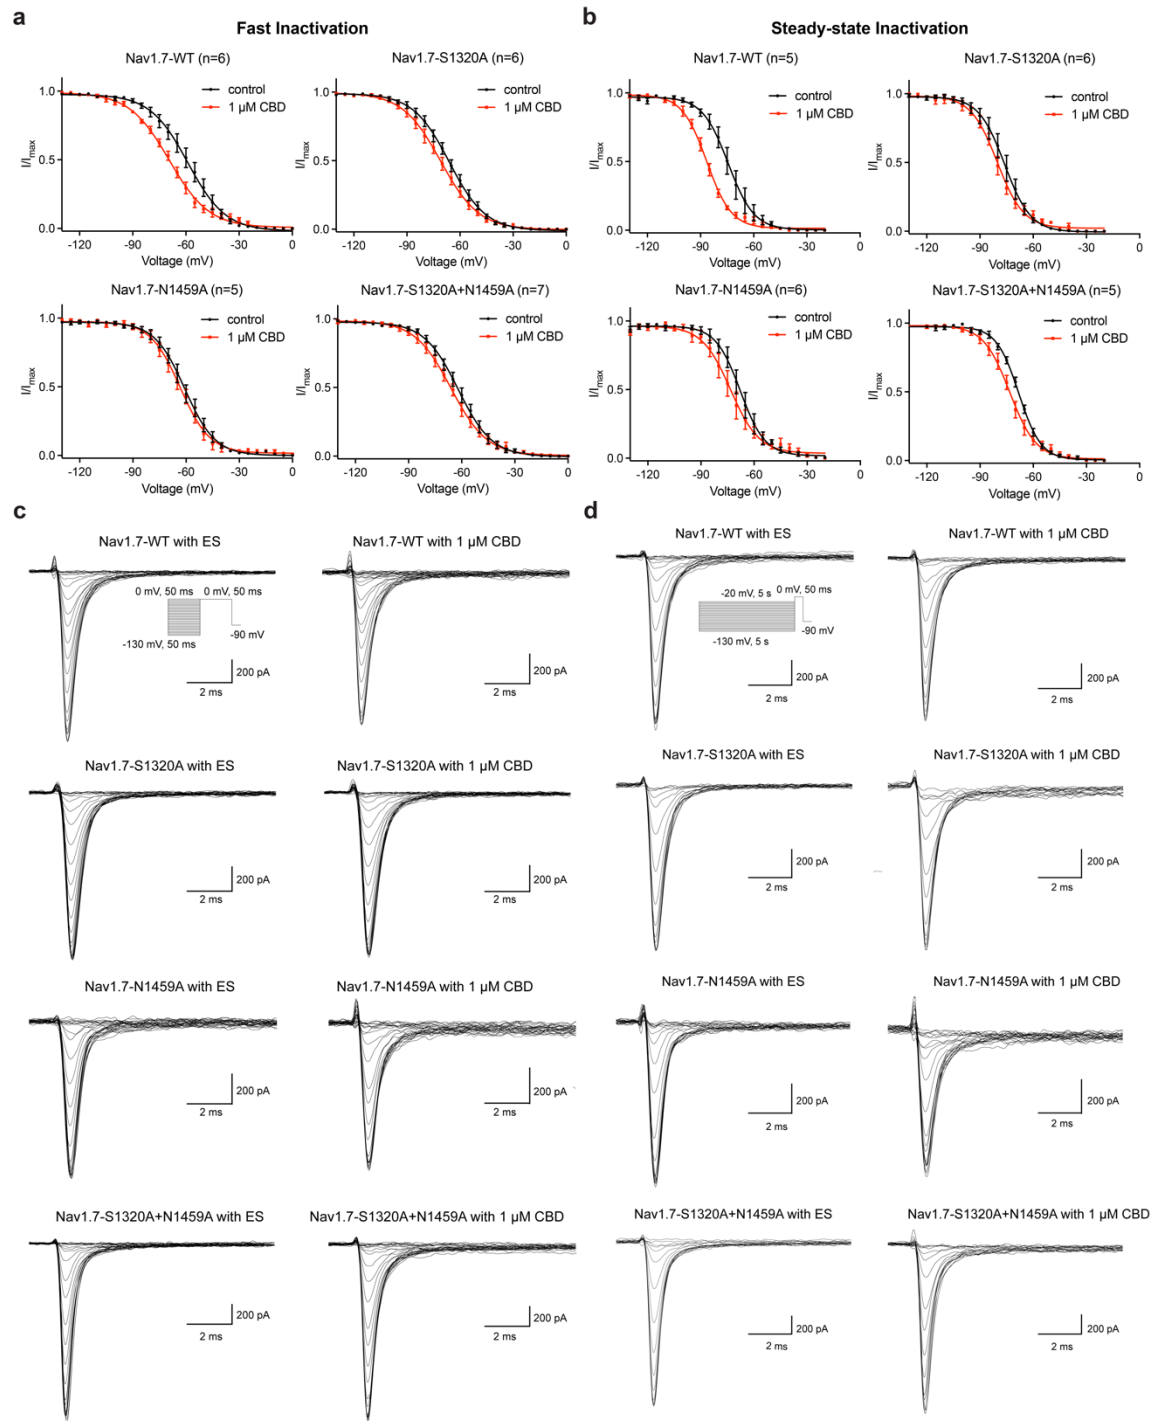

**Supplementary Fig. 8 | Fast and steady-state inactivation of Nav1.7 variants by CBD. a,b** Voltage-dependent fast (a) and steady-state (b) inactivation of Nav1.7 and IFM related mutations (S1320A, N1459A, and S1320A+N1459A) after 1  $\mu$ M CBD treatment. *n* biological independent cells. **c,d** Representative traces for fast (left) and steady-state

(*right*) inactivation of Na<sub>v</sub>1.7 variants after 1  $\mu$ M CBD treatment. Please refer to Methods section for experimental details and Supplementary Table 2 for the measured parameters.

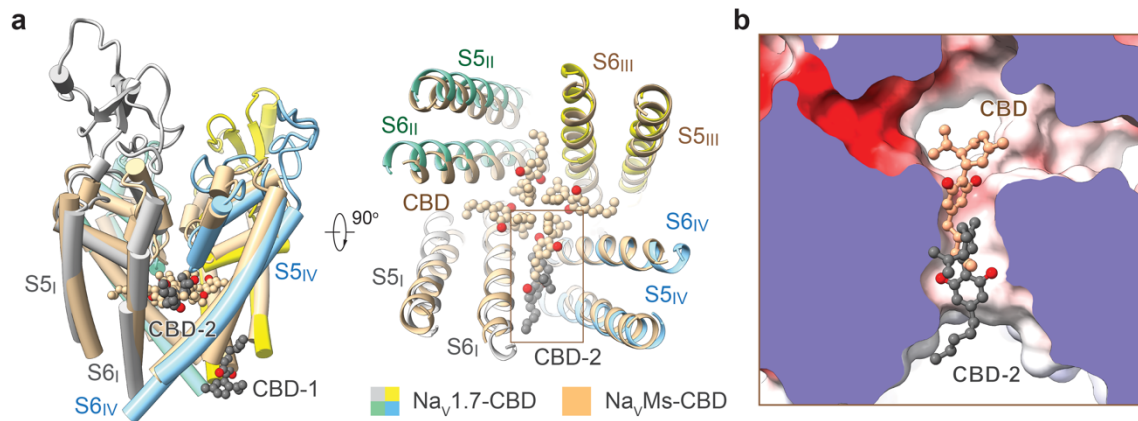

**Supplementary Fig. 9 | Comparison of CBD binding in  $\text{Na}_v1.7$  and  $\text{Na}_v\text{Ms}$  at the F-site.** **a** Deviation of the CBD binding poses in  $\text{Na}_v1.7$  and  $\text{Na}_v\text{Ms}$ . A side view (*left*) and a top view (*right*) of the superimposed pore domain of CBD-bound  $\text{Na}_v1.7$  (domain colored) and  $\text{Na}_v\text{Ms}$  (pink, PDB: 6YZ0) are shown. One CBD molecule occupies the fenestration enclosed by repeats I and IV of  $\text{Na}_v1.7$ , whereas four CBD molecules each binds to a fenestration site in  $\text{Na}_v\text{Ms}$ . **b** Different CBD binding poses at the F-site in  $\text{Na}_v1.7$  and  $\text{Na}_v\text{Ms}$ . The pore domain of  $\text{Na}_v1.7$  is shown as a cut-open electrostatic surface.

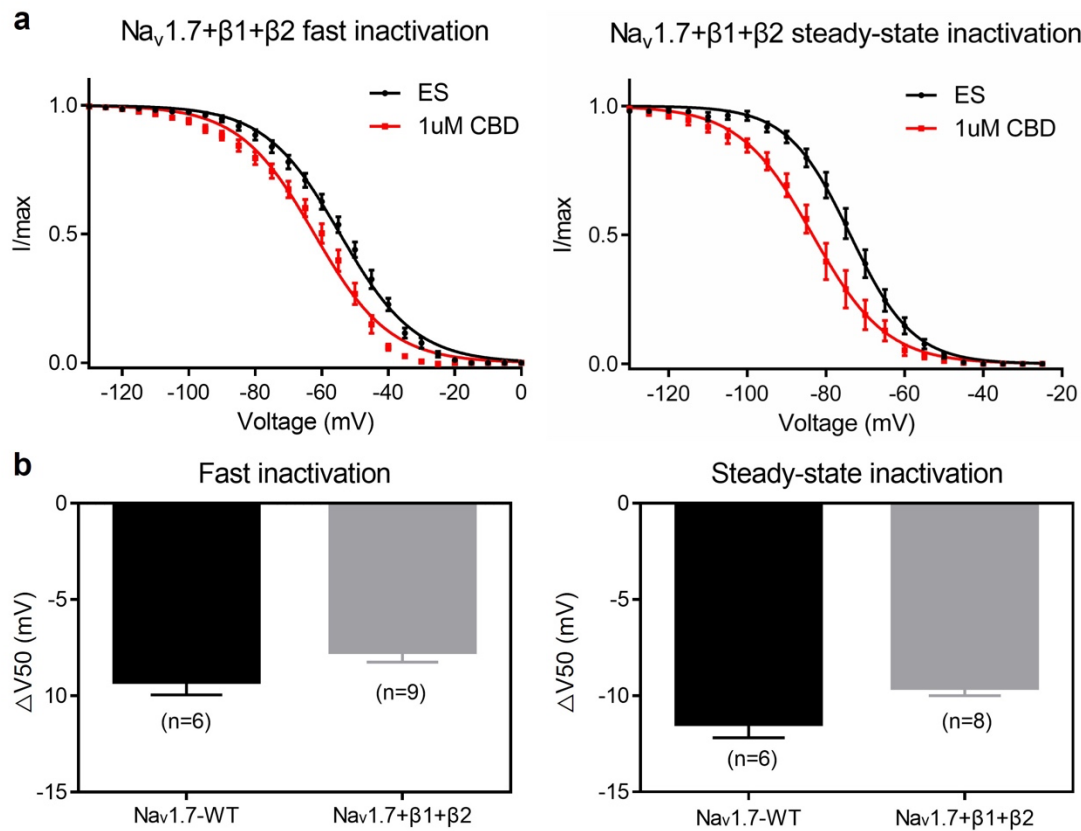

**Supplementary Fig. 10 | CBD produces similar effects on the voltage-dependence of channel availability in  $\text{Na}_v1.7$  channels studied with or without co-expressed  $\beta1$  and  $\beta2$  subunits.** **a** Voltage-dependent fast (*left*) and steady-state (*right*) inactivation of  $\text{Na}_v1.7$  and  $\text{Na}_v1.7$  co-expressed with  $\beta1$  and  $\beta2$  after 1  $\mu\text{M}$  CBD treatment. The voltage-dependence of channel availability was measured for fast inactivation (50-ms prepulses) and steady-state inactivation (5-s prepulses) as described in Methods. **b** Co-expressed with  $\beta1$  and  $\beta2$  doesn't modify shifts in fast and steady-state inactivation induced by 1  $\mu\text{M}$  CBD. The  $\Delta V_{50}$  values for fast inactivation:  $-9.26 \pm 0.69$  mV (WT,  $n = 6$ ),  $-7.71 \pm 0.53$  mV ( $n = 9$ ); for steady-state inactivation:  $-11.46 \pm 0.72$  mV (WT,  $n = 6$ ),  $-9.58 \pm 0.42$  mV ( $n = 8$ ). Data represent mean  $\pm$  SEM.  $n$  biological independent cells.

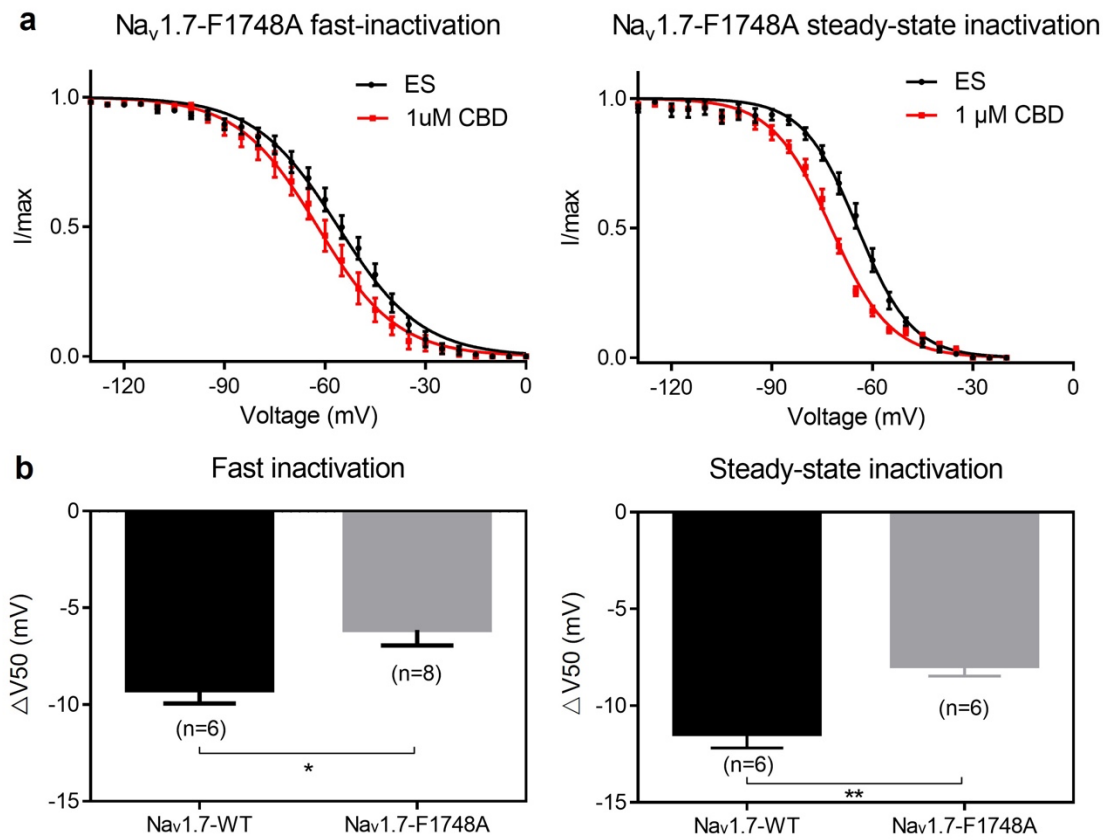

**Supplementary Fig. 11 | Effect of mutating F1748 on CBD-induced shift of voltage-dependence of channel availability.** **a** Voltage-dependent fast (*left*) and steady-state (*right*) inactivation of Nav<sub>v</sub>1.7 and Nav<sub>v</sub>1.7-F1748A after 1 μM CBD treatment. The voltage-dependence of channel availability was measured for fast inactivation (50-ms prepulses) and steady-state inactivation (5-s prepulses) as described in Methods. **b** Mutation modify shifts in fast and steady-state inactivation induced by 1 μM CBD. The ΔV<sub>50</sub> values for fast inactivation:  $-9.26 \pm 0.69$  mV (WT,  $n = 6$ ),  $-6.14 \pm 0.81$  mV ( $n = 8$ ); for steady-state inactivation:  $-11.46 \pm 0.72$  mV (WT,  $n = 6$ ),  $-7.94 \pm 0.53$  mV ( $n = 6$ ). Data represent mean  $\pm$  SEM.  $n$  biological independent cells.

**Supplementary Table 1 | Statistics for data collection and structural refinement.**

| hNav1.7-CBD                                      |           |
|--------------------------------------------------|-----------|
| <b>Data collection and processing</b>            |           |
| Magnification                                    | 105,000   |
| Voltage (kV)                                     | 300       |
| Electron dose (e-/Å <sup>2</sup> )               | 50        |
| Defocus range (μm)                               | -1.6~-1.2 |
| Pixel size (Å)                                   | 1.114     |
| Symmetry                                         | C1        |
| Initial particle images (no.)                    | 5,126,502 |
| Final particle images (no.)                      | 488,974   |
| Map resolution (Å)                               | 2.8/3.2   |
| FSC threshold<br>(half-map/model-map)            | 0.143/0.5 |
| <b>Refinement</b>                                |           |
| Initial model used                               | 7W9K      |
| Map sharpening <i>B</i> factor (Å <sup>2</sup> ) | -71.9     |
| Model composition                                |           |
| Non-hydrogen atoms                               | 13,725    |
| Protein residues                                 | 1,574     |
| Ligands                                          | 37        |
| <i>B</i> factors (Å <sup>2</sup> )               |           |
| Protein                                          | 128.55    |
| Ligand                                           | 134.57    |
| R.m.s deviations                                 |           |
| Bond lengths (Å)                                 | 0.003     |
| Bond angles (°)                                  | 0.647     |
| Validation                                       |           |
| MolProbity score                                 | 1.72      |
| Clashscore                                       | 7.99      |
| Poor rotamers (%)                                | 0.77      |
| Ramachandran plot                                |           |
| Favored (%)                                      | 95.83     |
| Allowed (%)                                      | 4.17      |
| Disallowed (%)                                   | 0.00      |

**Supplementary Table 2 | Concentration-response curves of CBD on Na<sub>v</sub>1.7-WT and mutations in HEK293T cells.**

|   |                       | 1.7-WT      | 1.7-V383A                  | 1.7-F387A                  | 1.7-S1320A                  | 1.7-N1459A               | 1.7-S1320A+N1459A           |
|---|-----------------------|-------------|----------------------------|----------------------------|-----------------------------|--------------------------|-----------------------------|
|   | IC <sub>50</sub> (μM) | 1.82 ± 0.10 | 3.56 ± 0.58 <sup>***</sup> | 3.65 ± 0.78 <sup>***</sup> | 3.81 ± 0.42 <sup>****</sup> | 2.46 ± 0.28 <sup>*</sup> | 4.28 ± 0.67 <sup>****</sup> |
|   | P                     | /           | < 0.0001                   | 0.0008                     | < 0.0001                    | 0.0236                   | < 0.0001                    |
|   | Slope                 | 1.64 ± 0.15 | 1.37 ± 0.31                | 1.24 ± 0.45                | 1.38 ± 0.22                 | 2.17 ± 0.55              | 1.27 ± 0.26                 |
|   | P                     | /           | 0.3800                     | 0.3246                     | 0.3329                      | 0.2273                   | 0.1904                      |
| n | 100 nM                | 1           | /                          | /                          | /                           | /                        | /                           |
|   | 300 nM                | 5           | /                          | /                          | /                           | 3                        | /                           |
|   | 1 μM                  | 12          | 5                          | 4                          | 3                           | 9                        | 7                           |
|   | 3 μM                  | 8           | 4                          | 6                          | 5                           | 7                        | 4                           |
|   | 10 μM                 | 7           | 5                          | 4                          | 5                           | 5                        | 4                           |
|   | 30 μM                 | /           | /                          | /                          | 2                           | /                        | /                           |

\* P < 0.05 versus WT, \*\*\* P < 0.001 versus WT, \*\*\*\* P < 0.0001 versus WT. Each data point represents mean ± s.e.m and *n* is the number of experimental cells from which recordings were obtained. The extra sum-of-squares F test was used to compare the IC<sub>50</sub> and slope factor of concentration-response curves. P values for IC<sub>50</sub> comparation: < 0.0001, 0.0008, < 0.0001, 0.0236, < 0.0001 (Na<sub>v</sub>1.7-WT v.s. Na<sub>v</sub>1.7-V383A, Na<sub>v</sub>1.7-F387A, Na<sub>v</sub>1.7-S1320A, Na<sub>v</sub>1.7-N1459A, Na<sub>v</sub>1.7-S1320A +N1459A). P values for slope comparation: 0.3800, 0.3246, 0.3329, 0.2273, 0.1904 (Na<sub>v</sub>1.7-WT v.s. Na<sub>v</sub>1.7-V383A, Na<sub>v</sub>1.7-F387A, Na<sub>v</sub>1.7-S1320A, Na<sub>v</sub>1.7-N1459A, Na<sub>v</sub>1.7-S1320A +N1459A).

**Supplementary Table 3 | Fast and steady-state inactivation parameters of Nav1.7 and IFM related mutations in HEK293T cells before and after 1  $\mu$ M CBD application.**

| Fast inactivation         |               |                       |          |                    |        |                 |        |   |
|---------------------------|---------------|-----------------------|----------|--------------------|--------|-----------------|--------|---|
| Parameters                |               | V <sub>1/2</sub> (mV) | P        | slope              | P      | Tau (ms)        | P      | n |
| Nav1.7-WT                 | ES            | -60.30 $\pm$ 0.58     | /        | 10.84 $\pm$ 0.51   | /      | 0.56 $\pm$ 0.03 | /      | 6 |
|                           | 1 $\mu$ M CBD | -69.56 $\pm$ 0.38**** | < 0.0001 | 11.74 $\pm$ 0.34   | 0.1549 | 0.69 $\pm$ 0.10 | 0.2236 | 6 |
| Nav1.7-S1320A             | ES            | -66.71 $\pm$ 0.39     | /        | 10.28 $\pm$ 0.34** | /      | 0.60 $\pm$ 0.05 | /      | 6 |
|                           | 1 $\mu$ M CBD | -71.17 $\pm$ 0.42**** | < 0.0001 | 10.88 $\pm$ 0.37   | 0.2291 | 0.54 $\pm$ 0.02 | 0.2802 | 6 |
| Nav1.7-N1459A             | ES            | -61.54 $\pm$ 0.48     | /        | 9.21 $\pm$ 0.43    | /      | 0.54 $\pm$ 0.03 | /      | 5 |
|                           | 1 $\mu$ M CBD | -63.63 $\pm$ 0.50**   | 0.0028   | 9.28 $\pm$ 0.44    | 0.9132 | 0.54 $\pm$ 0.05 | 0.9519 | 5 |
| Nav1.7-S1320A+N1459A      | ES            | -62.78 $\pm$ 0.42     | /        | 10.05 $\pm$ 0.37   | /      | 0.59 $\pm$ 0.05 | /      | 7 |
|                           | 1 $\mu$ M CBD | -66.36 $\pm$ 0.44**** | < 0.0001 | 10.65 $\pm$ 0.38   | 0.2726 | 0.54 $\pm$ 0.04 | 0.5516 | 7 |
| Steady-state inactivation |               |                       |          |                    |        |                 |        |   |
| Parameters                |               | V <sub>1/2</sub> (mV) | P        | slope              | P      | Tau (ms)        | P      | n |
| Nav1.7-WT                 | ES            | -75.01 $\pm$ 0.64     | /        | 7.93 $\pm$ 0.56    | /      | 0.61 $\pm$ 0.07 | /      | 6 |
|                           | 1 $\mu$ M CBD | -86.47 $\pm$ 0.33**** | < 0.0001 | 7.51 $\pm$ 0.29    | 0.5224 | 0.64 $\pm$ 0.06 | 0.7350 | 6 |
| Nav1.7-S1320A             | ES            | -76.69 $\pm$ 0.59     | /        | 7.66 $\pm$ 0.52**  | /      | 0.64 $\pm$ 0.07 | /      | 6 |
|                           | 1 $\mu$ M CBD | -80.08 $\pm$ 0.46**** | < 0.0001 | 8.21 $\pm$ 0.41    | 0.4304 | 0.57 $\pm$ 0.04 | 0.3732 | 6 |
| Nav1.7-N1459A             | ES            | -68.20 $\pm$ 0.61     | /        | 8.00 $\pm$ 0.55    | /      | 0.56 $\pm$ 0.09 | /      | 6 |
|                           | 1 $\mu$ M CBD | -73.22 $\pm$ 0.77**** | < 0.0001 | 9.67 $\pm$ 0.69    | 0.0761 | 0.59 $\pm$ 0.06 | 0.8334 | 6 |
| Nav1.7-S1320A+N1459A      | ES            | -68.60 $\pm$ 0.26     | /        | 6.83 $\pm$ 0.23    | /      | 0.53 $\pm$ 0.06 | /      | 5 |
|                           | 1 $\mu$ M CBD | -73.36 $\pm$ 0.45**** | < 0.0001 | 7.99 $\pm$ 0.40*   | 0.0149 | 0.59 $\pm$ 0.06 | 0.5410 | 5 |



\*  $P < 0.05$  versus WT, \*\*\*  $P < 0.001$  versus WT, \*\*\*\*  $P < 0.0001$  versus WT. Each data point represents mean  $\pm$  s.e.m and  $n$  is the number of experimental cells from which recordings were obtained. ES means external solution. The extra sum-of-squares F test was used to compare the  $V_{1/2}$  and slope factor of activation fits. P values for  $V_{1/2}$  comparation before and after 1  $\mu$ M CBD treatment:  $< 0.0001$ ,  $< 0.0001$ ,  $0.0028$ ,  $< 0.0001$  (fast inactivation);  $< 0.0001$ ,  $< 0.0001$ ,  $< 0.0001$ ,  $< 0.0001$  (steady-state inactivation). P values for slope comparation before and after 1  $\mu$ M CBD treatment:  $0.1549$ ,  $0.2291$ ,  $0.9132$ ,  $0.2726$  (fast inactivation);  $0.5224$ ,  $0.4304$ ,  $0.0761$ ,  $0.0149$  (steady-state inactivation). P values for tau comparation before and after 1  $\mu$ M CBD treatment:  $0.2236$ ,  $0.2802$ ,  $0.9519$ ,  $0.5516$  (fast inactivation);  $0.7350$ ,  $0.3732$ ,  $0.8334$ ,  $0.5410$  (steady-state inactivation). Fast inactivation,  $\text{Na}_v1.7\text{-WT}$ ,  $n = 6$ ,  $\text{Na}_v1.7\text{-S1320A}$ ,  $n = 6$ ,  $\text{Na}_v1.7\text{-N1459A}$ ,  $n = 5$ ,  $\text{Na}_v1.7\text{-S1320A} + \text{N1459A}$ ,  $n=7$ . Steady-state inactivation,  $\text{Na}_v1.7\text{-WT}$ ,  $n = 6$ ,  $\text{Na}_v1.7\text{-S1320A}$ ,  $n = 6$ ,  $\text{Na}_v1.7\text{-N1459A}$ ,  $n = 6$ ,  $\text{Na}_v1.7\text{-S1320A} + \text{N1459A}$ ,  $n = 5$ . Data represent mean  $\pm$  SEM.  $n$  biological independent cells.
